# Supplementary material for: Protection of highly active sites on Cu2O nanocages: an efficient crystalline catalyst for ammonium perchlorate decomposition
Source: Royal Society of Chemistry journal article supplement (doi:10.1039/d0ce01418d), 2020-01-01
Supplement: d0ce01418d1.pdf [file d0ce01418d1.pdf]

## Supporting Information

### Protection of high active sites on $\text{Cu}_2\text{O}$ nanocages: an efficient crystalline catalyst for ammonium perchlorate decomposition

Tao-Tao Lv <sup>a,b</sup>, Hui-Xiang Wang <sup>b</sup>, Xiao-Bo Ren <sup>b</sup>, Lian-Cheng Wang <sup>b</sup>, Rui-Min Ding <sup>b</sup>,  
Jing-Pei Cao <sup>a,b,\*</sup>, Bao-Liang Lv <sup>a,b,\*</sup>

<sup>a</sup> Key Laboratory of Coal Processing and Efficient Utilization (Ministry of Education), China University of Mining & Technology, Xuzhou 221116, China

<sup>b</sup> State Key Laboratory of Coal Conversion, Institute of Coal Chemistry, Chinese Academy of Sciences, Taiyuan 030001, China

\*E-mail: s: caojingpei@cumt.edu.cn; lbl604@sxicc.ac.cn

Fax: +86-351-4041153; Tel: +86-351-4063121

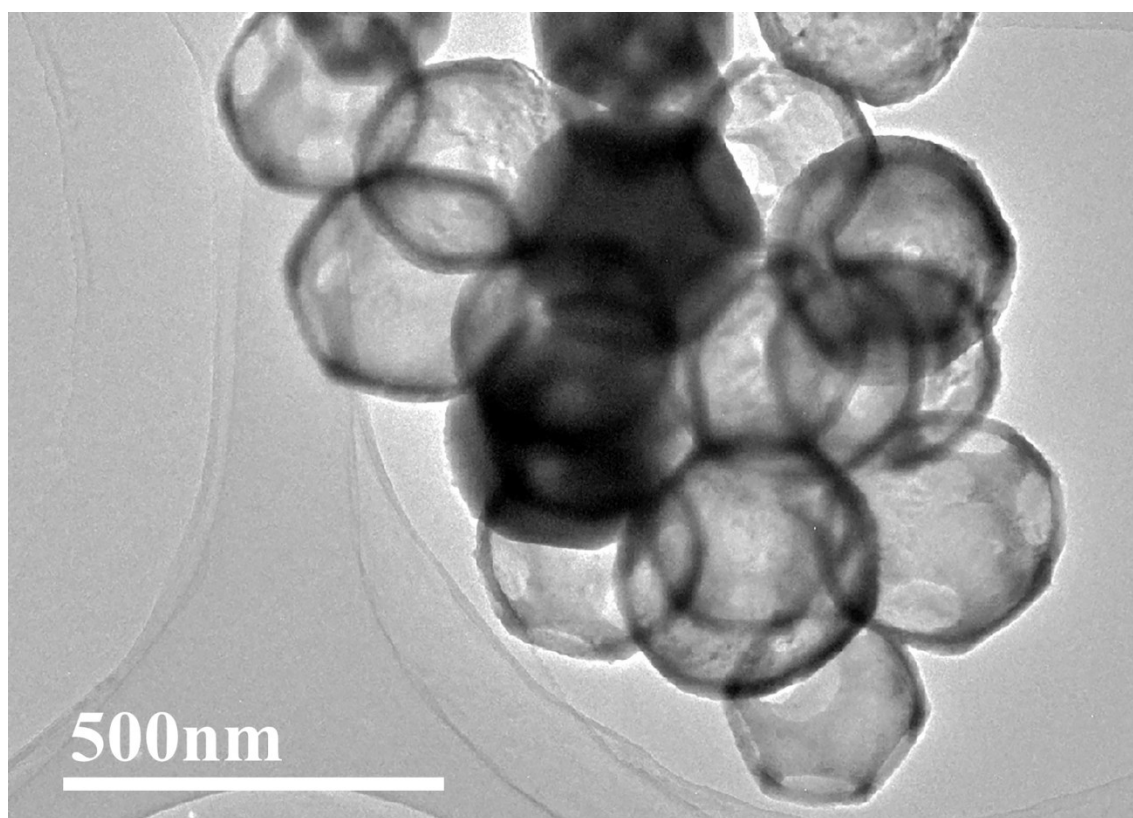

Fig. S1 TEM image of  $\text{Cu}_2\text{O}$  nanocages.

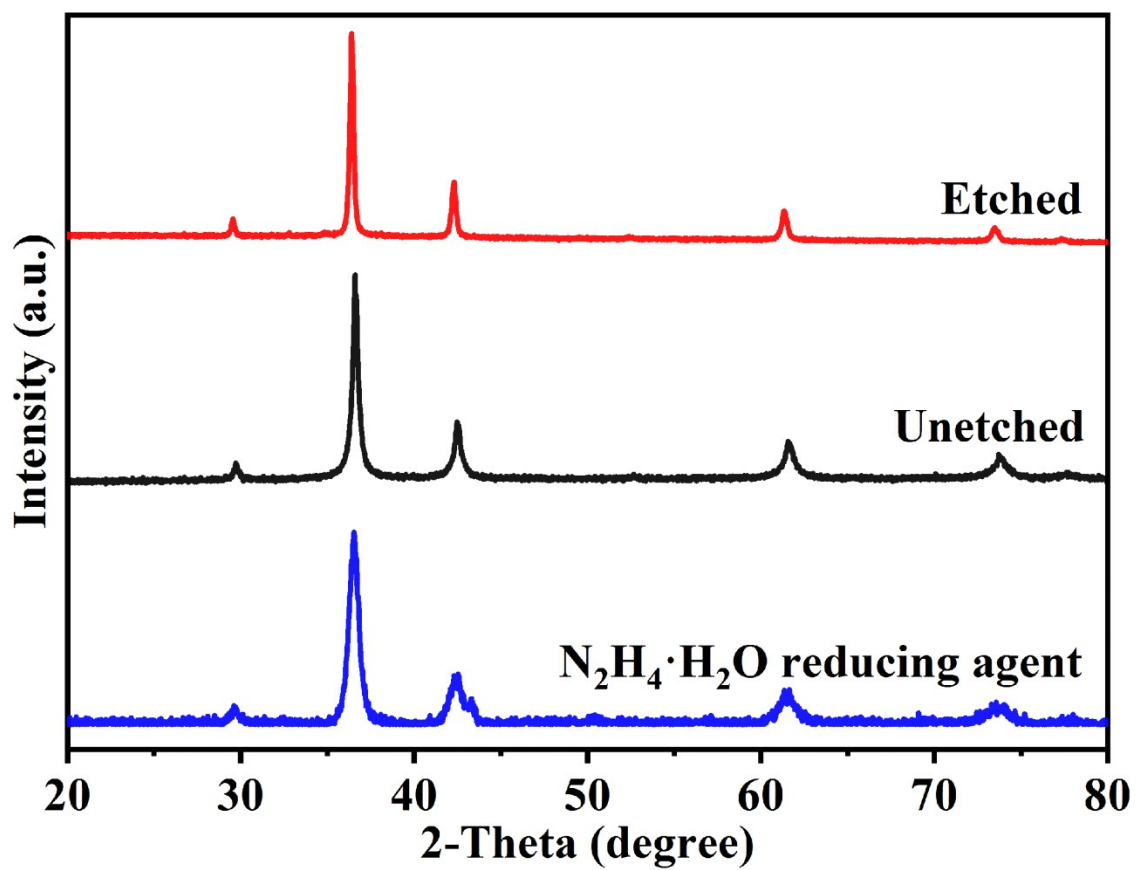

Fig. S2 Comparison of XRD patterns: etched, unetched and Cu<sub>2</sub>O by a reducing agent of N<sub>2</sub>H<sub>4</sub>·H<sub>2</sub>O.

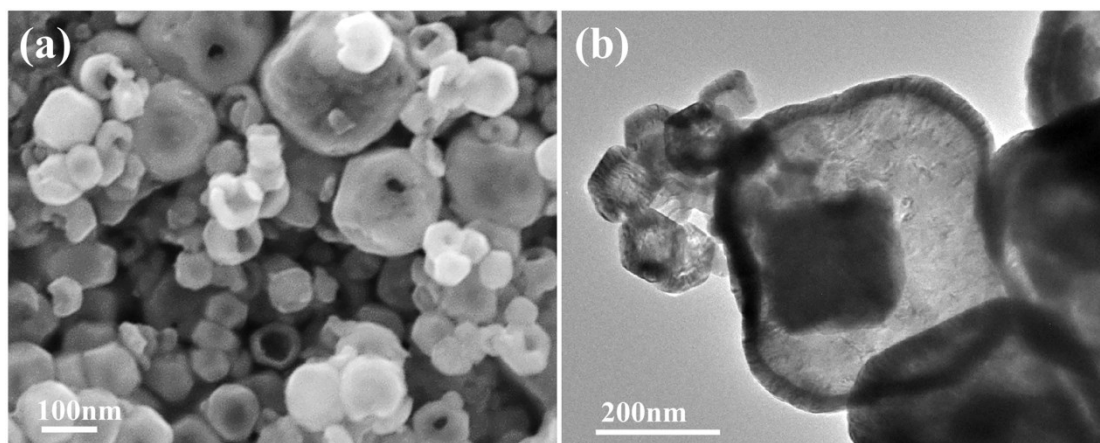

Fig. S3 (a) SEM and (b) TEM of Cu<sub>2</sub>O without SDS added during synthesis.

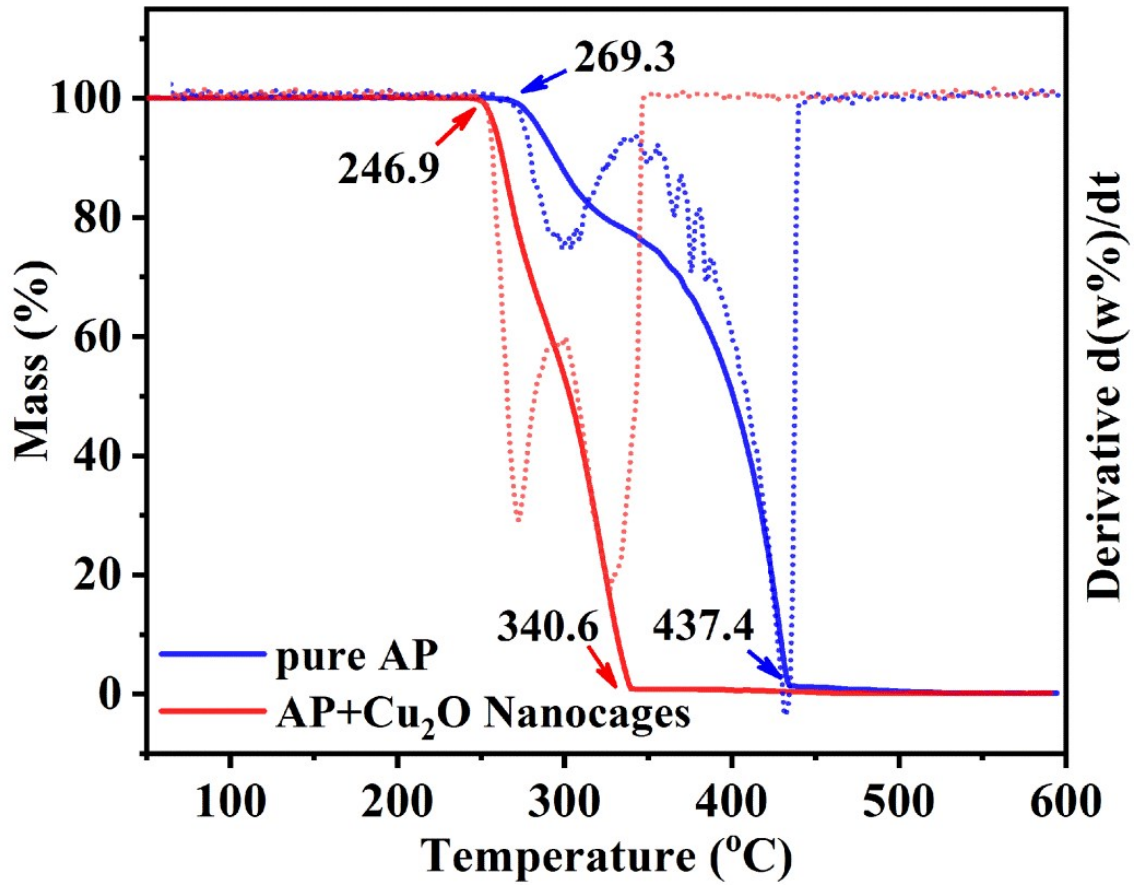

Fig. S4 TG and DTG curves for pure AP and AP with Cu<sub>2</sub>O nanocage.

Tab. S1 Comparison of DSC data of Cu<sub>2</sub>O and other catalysts in AP thermal decomposition.

| Nanocatalyst                     | M (%)    | dT/dt °C/min | LTD          |              | HTD          |              | Ref.            |
|----------------------------------|----------|--------------|--------------|--------------|--------------|--------------|-----------------|
|                                  |          |              | LTD AP       | AP+Cat       | HTD AP       | AP+Cat       |                 |
| CeO <sub>2</sub>                 | 4        | 5            | 301.9        | 289.5        | 428.5        | 378.1        | [1]             |
| α-Fe <sub>2</sub> O <sub>3</sub> | 2        | 10           | 313.2        | 297.5        | 437.4        | 386.8        | [2]             |
| CuO                              | 5        | 10           | 293.4        | 271.5        | 435.2        | 353.8        | [3]             |
| CuO/MoS <sub>2</sub>             | 5        | 10           | 293.4        | 296.8        | 435.2        | 323.5        | [4]             |
| LaMnO <sub>3</sub>               | 5        | 10           | 295.8        | 290.3        | 416.0        | 331.8        | [5]             |
| <b>Cu<sub>2</sub>O</b>           | <b>2</b> | <b>5</b>     | <b>295.9</b> | <b>268.8</b> | <b>431.9</b> | <b>324.9</b> | <b>Our work</b> |

### References

- 1 J. Shi, H. Wang, Y. Liu, X. Ren, H. Sun and B. Lv, *Inorg. Chem. Front.*, 2019, 6, 1735-1743.
- 2 S. b. Cao, X. G. Han, L. L. Zhang, J. X. Wang, Y. Luo, H. K. Zou and J. F. Chen, *Powder Technol.*, 2019, 353, 444-449.
- 3 Y. Hu, S. Yang, B. Tao, X. Liu, K. Lin, Y. Yang, R. Fan, D. Xia and D. Hao, *Vacuum*, 2019, 159, 105-111.
- 4 Y. Hu, Y. Yang, R. Fan, K. Lin, D. Hao, D. Xia and P. Wang, *Appl. Organomet. Chem.*, 2019, 33, e5060.
- 5 Y. Hu, B. Tao, F. Shang, M. Zhou, D. Hao, R. Fan, D. Xia, Y. Yang, A. Pang and K. Lin, *Appl. Surf. Sci.*, 2020, 513, 145849.
